# Supplementary material for: Function and Regulation of AUTS2, a Gene Implicated in Autism and Human Evolution
Source: PLoS Genet. 2013 Jan 17;9(1):e1003221. doi: 10.1371/journal.pgen.1003221 (PMC3547868; doi:10.1371/journal.pgen.1003221)
Supplement: Table S1 — AUTS2 enhancer candidates (AECs) selected for enhancer assays. (XLSX) [file pgen.1003221.s006.xlsx]

## Sheet: Table S1
Table S1. AUTS2 enhancer candidates (AECs) selected for enhancer assays
AEC #	Chromosomal position (hg18)	Location	Conservation ǂ	Forebrain/Midbrain p300 ChIP-Seq peak ǂǂ	Human-Neanderthal conservation*	Zebrafish enhancer?	Tissue **	Mouse Enhancer? ◊	Tissue ◊◊	Forward Primer	Reverse primer	Size (bp)
1	chr7:68,724,902-68,728,333	Sweep	Chicken	Midbrain P300	(D,D,D,D,D,D,D)	No	Negative	Not Tested		GGGTAGAAAGAACTGCCTTGATT	GGCTTCCACATCTGACAGTAGAC	3246
2	chr7:68,812,867-68,814,245	Sweep	Chicken	Midbrain p300	(DD,D)	No	Negative	Not Tested		CCCTTTTTAGTTTCTTCCCTTCA	TACAAAGCACCTGCTCTTTTCTC	1444
3	chr7:68,821,855-68,823,820	Sweep, dyslexia non-coding deletion (S. Girirajan et al., Plos Genetics (2011) 7: e1002334)	Chicken	Midbrain p300	(D,DDD)	Yes	Dots around caudal end of tail in somite area (18%, 24hpf)	Not Tested		ACCCCAGCCACTTAGTTTTGTA	ACCTAGTAAACGCTGTTGTCCTG	1966
4	chr7:68,825,835-68,827,626	Sweep, dyslexia non-coding deletion (S. Girirajan et al., Plos Genetics (2011) 7: e1002334)	Opossum		(DDDDD,D,D)	Yes	Notochord (31%, 24hpf; 30%, 48hpf) Otic vesicle (16%, 24hpf; 28%, 48hpf)	Not Tested		GAAAACATGATCATTTCCAGGAG	CAATGATCACTAAGAGAGTTTGTGG	1792
5	chr7:68,841,424-68,843,440	Sweep, dyslexia non-coding deletion (S. Girirajan et al., Plos Genetics (2011) 7: e1002334)	Frog	Midbrain p300	(D,D,D,D)	Yes	Midbrain (39%, 24hpf; 27%, 48hpf) Somitic Muscle plus dots at end of tail (60%, 24hpf) Otic vesicle (15%, 48hpf) Somitic Muscle (16%, 48hpf)	Not Tested		CCCTCTCCCCAGCTGATATT	TTCTGATTTAAGTATGTTTTTGTCAAG	2017
6	chr7:68,875,482-68,877,048	Sweep, dyslexia non-coding deletion (S. Girirajan et al., Plos Genetics (2011) 7: e1002334)	Mouse		(D,D,D,D,D,DDD,DDDD,D)	Yes	Pericardium (29%, 24hpf; 34%, 48hpf) Eye (28%, 48hpf)	Not Tested		AGTGACTTGGACTACAGGCACAT	ACATCTTTGCTTAGCAGGCAGTA	1567
7	chr7:68,908,734-68,909,828	Sweep	Dog		(DDD,D,DDDD,D),	No	Negative	Not Tested		ATTTAGGCAGCAGTGACAGAAAG	CCAAATCTGATGAAGAGTCCAAC	1095
8	chr7:68,922,864-68,924,172	Sweep	Mouse		(DDDDD,D,D)	No	Negative	Not Tested		AAGTATGAGCCAGTCTTGAGGTG	TGAAAAACTTACTGGACTTAAATGTG	1309
9	chr7:68,928,408-68,929,934	Sweep	Mouse	Forebrain p300	(D,D,D,DDD)	No	Negative	Not Tested		GTAACCTTGTTGTCTTCCATTGC	GCCAAATGCCTAATAAAGACAGA	1527
10	chr7:68,963,804-68,965,620	Sweep, HACNS369	Opossum		(D,D,D,DDDD)	Yes	Midbrain (60%, 24hpf; 58%, 48hpf), Dots all over mostly above notochord (55%, 24hpf; 39%, 48hpf) Spinal cord (18%, 48hpf)	Yes	Midbrain (12/13, E12.5) Eye (6/13, E12.5) Proximal limb (6/13, E12.5)	GGAGGCTACTTTTCCTCTGAAAG	CAAGTCACCTTTAAGCTTCCTTCT	1817
11	chr7:68,966,890-68,968,624	Sweep	Chicken	Mid/forebrain p300	(D)	No	Negative	Not Tested		CTCTCTGACAGACCTGTGACTTG	TACACACAGGGGTTAAAAAGGAA	1735
12	chr7:68,996,372-68,998,072	Sweep	Opossum	Midbrain p300	(D,D,D,D,D)	Yes	Epidermis (59%, 24hpf; 50%, 48hpf) Forebrain (39% 24hpf; 34%, 48hpf) Heart (15%, 24hpf) Otic Vesicle (24%, 24hpf; 34%, 48hpf)	Not Tested		ACTTGACAGACCAAAATGACAGG	TGACTACATGCCTGTGTAATTGTTT	1701
13	chr7:69,036,983-69,038,688	Sweep	Mouse		(D,D)	Yes	Otic Vesicle (19%, 48hpf)	Yes (hs 1660)	Ear (5/8, E11.5)	GAAAACAGTTAGCTGCGGAATCT	TCTGGGTACAAACTTCACACTGA	1706
14	chr7:69,108,779-69,109,947	Sweep	Zebrafish		(D,D,D)	Yes	Somitic Muscle (18%, 24hpf)	Not Tested		TTATGTGCATGTTCCAAAGTTTTT	TAAGGATAAACAGCCCTGTGAAA	1229
15	chr7:69,166,208-69,168,337	Sweep	Chicken	Midbrain p300	(DD,D,D,DDDD,D,D,D,D,D,D)	Yes	Eye (19%, 48hpf)	Not Tested		ATGGGTTTTGGGTTTTGTTTTT	GCTGACAAAGTTTTGTGGTTTTT	2116
16	chr7:69,183,577-69,186,403	Sweep	Opossum	Midbrain p300	(D,D,D,D,D,DD)	Yes	Ventral Caudal region (25%, 24hpf; 26%, 48hpf)	Not Tested		CCAAATGAGAATGTAGCTCTGTG	TATGCTATATGGGTGCAATTTTT	2777
17	chr7:69,195,062-69,196,938	Sweep	Zebrafish		(D,D,D)	No	Negative	Not Tested		TCACCAGTACATTTTTATTCCTTCC	TGAGCATCTGTGCATCTAAAGTG	1877
18	chr7:69,200,457-69,202,216	Sweep	Zebrafish		(D,D,D)	Yes	Spots on top or end of tail (18%, 24hpf)	Not Tested		ATCAGAGATTGTTTGGAGAGCAT	GAGTGCAAGAAAATCTGCCTTTA	1818
19	chr7:69,206,936-69,208,600	Sweep	Zebrafish		(DD,D,D,D,DDDD,D)	Yes	Heart (42%, 24hpf; 33%, 48hpf) Hindbrain (23%, 24hpf) Somitic Muscle (38%, 48hpf)	Not Tested		CAAAAATGAAAGCAGCTTAATGG	GGAGAGGCCAGTAAATGAAGAGT	1721
20	chr7:69,217,233-69,219,228	Sweep	Opossum	Midbrain p300	(D,D,D,D,DDDDD)	Yes	Midbrain (22%, 24hpf)	Not Tested		GATGCTCATACAAATCAATGCAA	ATCATCCTTTCCAGAAATTCACC	1996
21	chr7:69,234,838-69,236,265	Sweep	Zebrafish		(DDD,D)	Yes	Spinal Cord (15%, 48hpf)	Yes (hs 1425)	Midbrain (4/6, E11.5)	TCTTGGGGTTGTAGGACTAGACA	TGTAAGAAAAATGGCTCAGGAGA	1428
22	chr7:69,236,069-69,238,171	Sweep, includes exon	Zebrafish		(D,DD,D,D)	No	Negative	Not Tested		GATCACACATCTATGGTGCTTCA	TGAAAAGGGTCACTAAATCCAGA	2175
23	chr7:69,274,050-69,276,432	Sweep boarder	Zebrafish		(D,DD,D,D,D)	Yes	Somitic Muscle (50%, 24hpf; 47%, 48hpf)	Not Tested		TGTCTCATGGAGAAATCCTCATT	AATATGCCAGATGCTGTTTCTGT	2411
24	chr7:69,284,310-69,286,965	HAR31	Chicken		(D,D,DDD,D,D,D,D,D,D)	Yes	Hindbrain (17%, 24hpf) Spinal cord (66%, 24hpf; 31%, 48hpf)	Yes	Eye (4/5, E11.5)	AACAGGCAAATTCTGTTGTAGGA	ATTTTCCTCTATGACCTGCCTTC	2656
25	chr7:69,312,912-69,316,619	Between sweep and ASD non-coding deletion	Zebrafish		(D,D,D,D,D,D,D)	Yes	Blood islands-yolk (18%, 24hpf)	Not Tested		CAAATGACATTGGGGTATAGGAA	TAGCAAGAGCCATCGTTTTAGAG	3654
26	chr7:69,316,920-69,317,888	Between sweep and ASD non-coding deletion	Opossum	Midbrain p300	(D,D)	Yes	Forebrain (45%, 24hpf; 40%, 48hpf) Otic Vesicle (23%, 48hpf)	Not Tested		AAGGTAACTGCAGCACTTTTGAA	GAGCTTGCAGTCTTGGAAACTT	969
27	chr7:69,340,167-69,341,551	ASD non-coding deletion (D. Pinto et al., Nature (2010) 466: 368-72)	Zebrafish	Midbrain P300	(D,D,D)	Yes	Somitic Muscle (30%, 48hpf)	Yes (hs 658)	Midbrain (11/15, E11.5) Neural tube (9/15, E11.5)	CCAGAACTTGAACCTTGCATCT	GGCAAGGAGGAGACATAAAATG	1385
28	chr7:69,343,769-69,346,450	ASD non-coding deletion (D. Pinto et al., Nature (2010) 466: 368-72)	Zebrafish		(D,D,D,DDD,D,D,D)	No	Negative	Not Tested		ACTCACCACCACAAGTCAGAAAT	GGTTAGCCTGAGTAAAACCCTGT	2715
29	chr7:69,358,340-69,359,796	ASD non-coding deletion (D. Pinto et al., Nature (2010) 466: 368-72)	Frog		(D,D,DDDDD,D)	Yes	Forebrain (olfactory organ) (15%, 48hpf) Heart (23%, 48hpf)	Yes	Olfactory epithelium (3/6, E12.5) Eye (6/6, E12.5)	CTTTTTCTGTGGTGTTCCTTTTG	CCCTTAGCTCTACACCAGACTGA	1410
30	chr7:69,359,964-69,362,937	ASD non-coding deletion (D. Pinto et al., Nature (2010) 466: 368-72)	Frog		(D,D,D)	No	Negative	Not Tested		GGCCTTCCTTACAGGTCTAATTG	AAACTTCGTAAGAAAATGGCAAA	2920
31	chr7:69,365,749-69,367,561	ASD non-coding deletion (D. Pinto et al., Nature (2010) 466: 368-72)	Frog		(D,D,D)	No	Negative	Not Tested		GGCCACAGTAGAGTCATGATGTT	CCCAGTGAAAAGGACAATAACAG	1781
32	chr7:69,369,740-69,372,052	ASD non-coding deletion (D. Pinto et al., Nature (2010) 466: 368-72)	Zebrafish		(D,DDDDD,D)	Yes	Midbrain (19%, 48hpf) Hindbrain (18%, 48hpf)	Yes	Midbrain (4/4, E12.5) Forebrain (4/4, E12.5) Hindbrain (4/4, E12.5) Eye (4/4, E12.5)	CTTTGACTTAACGAGAGCCTGAG	AGCAAATCTGGGTTAAGGATGAT	2262
33	chr7:69,374,313-69,375,754	To end of intron 4	Zebrafish		(D,D,D,D)	No	Negative	Not Tested		CAGCAGTGCTACCTTTCTACCTC	TGTCTTTCTAGAGACGTTTTCTTTACC	1442
34	chr7:69,439,813-69,441,520	To end of intron 4, epilepsy non-coding deltion (H. C. Mefford et al., PLoS genetics (2010)6: e1000962)	Zebrafish			No	Negative	Not Tested		GAAGCTTACTTACCTGCCTTGGT	AATTTCTTCTGGGCTTTAACTGG	1708
35	chr7:69,443,563-69,444,772	To end of intron 4, epilepsy non-coding deltion (H. C. Mefford et al., PLoS genetics (2010)6: e1000962), alcohol consumption SNP (G. Schumann et al., PNAS (2011), 108: 7119-24)	Zebrafish		(D)	No	Negative	Not Tested		AAGGTCAGCATCCTCAGTACAAA	TGCACTGCAAGTCAATAAGTTGT	1210
36	chr7:69,456,365-69,457,073	To end of intron 4, epilepsy non-coding deltion (H. C. Mefford et al., PLoS genetics (2010)6: e1000962)	Frog	Midbrain P300		Yes	Hindbrain (18%, 24hpf)	Not Tested		CAAATATCACACAGGAGACCTTTC	GACAGGGACAGGAATGTACTGAG	709
37	chr7:69,458,163-69,460,029	To end of intron 4, epilepsy non-coding deltion (H. C. Mefford et al., PLoS genetics (2010)6: e1000962)	Zebrafish	Forebrain p300	(D,DD,D,D,D,D,D,D)	No	Negative	Not Tested		TTCCAGAAATCCGACAGAAAGTA	CTTCCCACTTAGAGCCCAACTAC	1867
38	chr7:69,479,431-69,480,094	To end of intron 4	Mouse	Midbrain P300	(D,D,D)	Yes	Epidermis, only on head (24%, 24hpf)	Not Tested		ATATCCTGGGTGGGCATGAGTAT	CTTTAGGCTTCAAAGAAGCATGG	664
39	chr7:69,534,927-69,536,470	To end of intron 4	Fugu		(DD,D,D,D,D)	No	Negative	Not Tested		CTGTGATTGCTGTAAGGCCTAGT	GAAGACTTTGAAGGCCTAGAACC	1544
40	chr7:69,654,802-69,656,119	HACNS174	Frog		(DD,D)	No	Negative	Not Tested		AAAGGGAAAACCACCATCACTAC	TAAAATACGCACAGGGTCTGTCT	1318
ǂ Comparative genomics carried out using the ECR browser (http://ecrbrowser.dcode.org/) with the following parameters: ≥70% identity for at least 100bp.
ǂǂ EP300 ChIP-Seq data taken from A. Visel et al., Nature 457, 854-8 (2009)
* "D" represents the derived status of a SNP. A red SNPS means that at least four of the six modern human genomes are derived. Additional Information regarding human-Neanderthal SNPs can be found here: http://genome.ucsc.edu/cgi-bin/hgTrackUi?hgsid=226193491&c=chr7&g=ntSssSnps
** Zebrafish tissue data: the tissues specific expression of sequences positive for enhancer activity are mentioned along with the percent positive of total alive fish after subtracting out the empty vector followed by the hours post fertilization (hpf) of expression.
◊ Mouse enhancer data for (hs 1425), (hs 658) and (hs 1660) were aquired from the VISTA enhancer browser: http://enhancer.lbl.gov/
◊◊ Mouse tissue data: the tissue specific expression of the sequences positive for enhancer activity out of the total LacZ stained mice along with the embryonic day (E) that they were assayed at.
